# Supplementary material for: Chelation therapy-inspired design of a water-stable fluorescent probe for the effectual monitoring of copper(ii) ions in real water
Source: Royal Society of Chemistry journal article supplement (doi:10.1039/d4ay00808a), 2024-01-01
Supplement: d4ay00808a1.pdf [file d4ay00808a1.pdf]

## Supplementary Information

# Chelation Therapy-inspired Design of a Water-stable Fluorescent Probe for Effectual Monitoring of Copper(II) ions in Real Water

Suvojit Roy,<sup>a</sup> Prosenjit Choudhury,<sup>b</sup> and Bhaskar Biswas<sup>a,\*</sup>

<sup>a</sup>*Department of Chemistry, University of North Bengal, Darjeeling 734013, India.*

<sup>b</sup>*Department of Physics, Dr. Meghnad Saha College, Itahar, Uttar Dinajpur 733128, India.*

## Table of Content

|                                                                                                                                                                                                           | Page No. |
|-----------------------------------------------------------------------------------------------------------------------------------------------------------------------------------------------------------|----------|
| <b>Scheme 1.</b> Synthesis of the precursor, sodium salt of salicylaldehyde-5-sulphonate                                                                                                                  | S1       |
| <b>Scheme 2.</b> Synthesis of the precursor, 2-hydroxy naphthalene hydrazone                                                                                                                              | S1       |
| <b>Scheme 3.</b> Synthesis of the Chemosensor, <b>SW2</b>                                                                                                                                                 | S1       |
| <b>Fig S1.</b> <sup>1</sup> H NMR spectrum (400 MHz, D <sub>2</sub> O) of the precursor, sodium salt of salicylaldehyde-5-sulphonate.                                                                     | S2       |
| <b>Fig S2.</b> <sup>1</sup> H NMR spectrum (400 MHz, DMSO-d <sup>6</sup> ) of the precursor, 2-hydroxy naphthalene hydrazone.                                                                             | S2       |
| <b>Fig S3.</b> <sup>1</sup> H NMR spectrum (400 MHz, DMSO-d <sup>6</sup> ) of <b>SW2</b>                                                                                                                  | S3       |
| <b>Fig S4.</b> <sup>13</sup> C NMR spectrum (101 MHz, DMSO-d <sup>6</sup> ) of <b>SW2</b>                                                                                                                 | S3       |
| <b>Fig S5.</b> ESI-MS of <b>SW2</b> in water                                                                                                                                                              | S4       |
| <b>Fig S6.</b> FT-IR spectrum of the chemosensor, <b>SW2</b>                                                                                                                                              | S4       |
| <b>Fig S7.</b> UV-Vis spectrum of the chemosensor, <b>SW2</b>                                                                                                                                             | S5       |
| <b>Fig S8.</b> Fluorescence spectra of <b>SW2</b> in water                                                                                                                                                | S5       |
| <b>Fig S9.</b> Water-phase stability of <b>SW2</b> for 5 days                                                                                                                                             | S6       |
| <b>Fig S10.</b> Spectrophotometry study of <b>SW2</b> with Cu (II) and other metal ions (M <sup>+2+/3+</sup> ) in H <sub>2</sub> O medium at 298 K                                                        | S6       |
| <b>Fig S11.</b> Spectrofluorimetric study of <b>SW2</b> with Cu (II) and other metal ions (M <sup>+2+/3+</sup> ) in H <sub>2</sub> O medium at 298 K                                                      | S7       |
| <b>Fig S12.</b> Fluorescence response of <b>SW2</b> towards Cu <sup>2+</sup> ions coexistence of other metal ions in aqueous medium.                                                                      | S7       |
| <b>Fig S13</b> Fluorescence spectra of <b>SW2</b> towards Cu <sup>2+</sup> in presence of different anions                                                                                                | S8       |
| <b>Fig S14.</b> Changes in the fluorescence spectrum upon a gradual addition of S <sup>2-</sup> to <b>SW2-Cu<sup>2+</sup></b> complex in H <sub>2</sub> O                                                 | S8       |
| <b>Fig S15.</b> Reversible switching cycles of fluorescence by alternating adding Cu <sup>2+</sup> and S <sup>2-</sup>                                                                                    | S9       |
| <b>Fig S16.</b> UV-Vis spectrum of the <b>SW2-Cu<sup>2+</sup> complex</b>                                                                                                                                 | S9       |
| <b>Fig S17.</b> ESI-MS of the <b>SW2-Cu<sup>2+</sup> complex</b>                                                                                                                                          | S10      |
| <b>Fig S18.</b> EPR of the <b>SW2-Cu<sup>2+</sup> complex</b>                                                                                                                                             | S10      |
| <b>Fig S19.</b> Ground state optimized geometries of the (a) <b>SW2</b> (b) <b>SW2-Cu<sup>2+</sup></b> (c) <b>SW2-Cu<sup>2+</sup> aqua complex</b>                                                        | S11      |
| <b>Fig S20.</b> The electron cloud distribution of LUMO and HOMO orbitals of <b>SW2</b> and <b>SW2-Cu<sup>2+</sup></b> .                                                                                  | S11      |
| <b>Fig S21.</b> Theoretical adsorption spectra of <b>SW2</b> and <b>SW2-Cu<sup>2+</sup></b>                                                                                                               | S12      |
| <b>Fig S22.</b> Mulliken charge analysis of the (a) <b>SW2</b> (b) <b>SW2-Cu<sup>2+</sup></b>                                                                                                             | S12      |
| <b>Fig S23</b> Spectrophotometric analysis for the determination of the concentration of Cu <sup>2+</sup> ion in the pesticide-contaminated water by comparing a known concentration of CuCl <sub>2</sub> | S13      |
| <b>(a).</b>                                                                                                                                                                                               |          |
| <b>Fig S23</b> Determination of the concentration of Cu <sup>2+</sup> ion in the                                                                                                                          | S13      |

(b). pesticide-contaminated water

**Table S1.** Computed absorption wavelengths ( $\lambda_{max}$  in nm), vertical excitation energies ( $E_{0-0}$  in eV), oscillator strengths (f), the composition of the corresponding electronic transitions (H, HOMO; L, LUMO) of **SW2** calculated by using B3LYP/6-31+G(d) level of theory **S14**

**Table S2.** Computed absorption wavelengths ( $\lambda_{max}$  in nm), vertical excitation energies ( $E_{0-0}$  in eV), oscillator strengths (f), the composition of the corresponding electronic transitions (H, HOMO; L, LUMO) of **SW2-Cu<sup>2+</sup>** Calculated by using B3LYP/6-31+G(d)/LAN2DZP level of theory **S15**

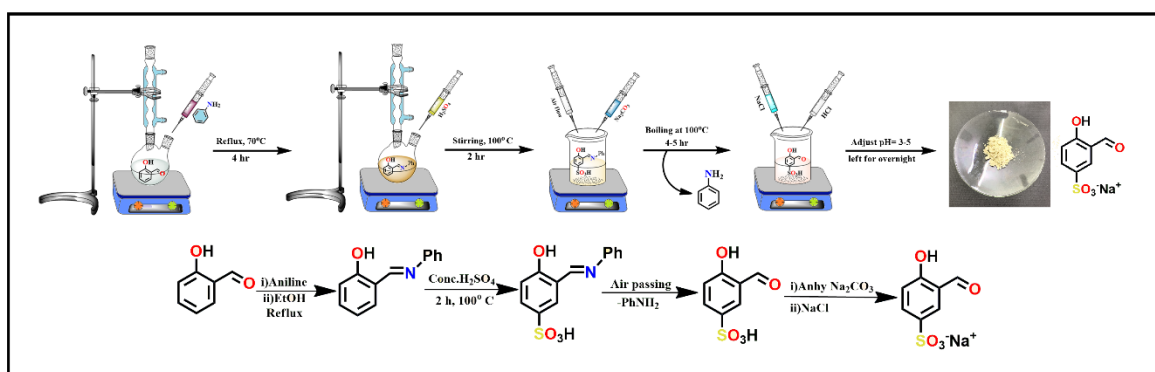

**Scheme S1.** Synthesis of the precursor, sodium salt of salicylaldehyde-5-sulphonate.

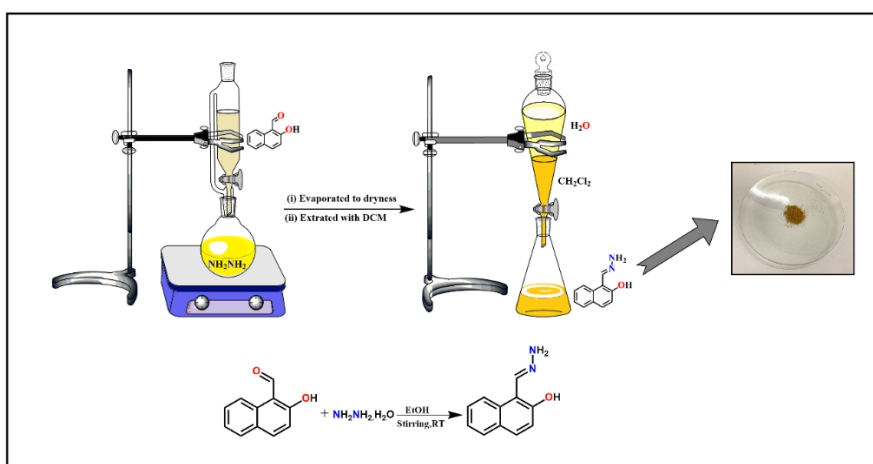

**Scheme S2.** Synthesis of the precursor, 2-hydroxy naphthalene hydrazone.

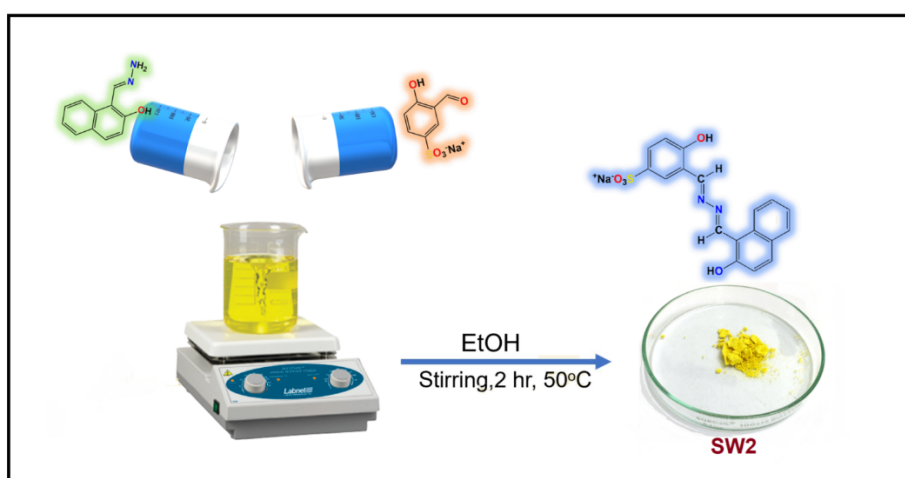

**Scheme S3.** Synthesis of the Chemosensor, SW2.

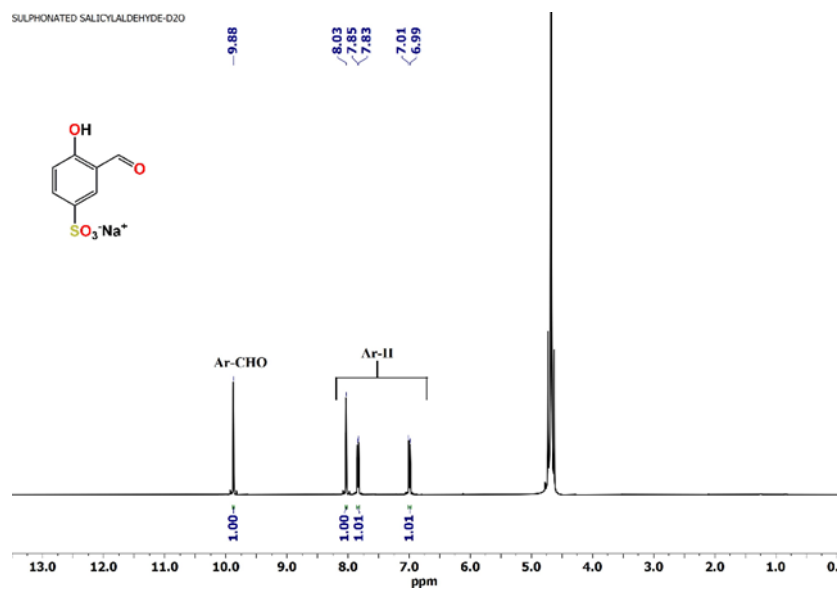

**Fig. S1.**  $^1\text{H}$  NMR spectrum (400 MHz,  $\text{D}_2\text{O}$ ) of the precursor, sodium salt of salicylaldehyde-5-sulphonate.

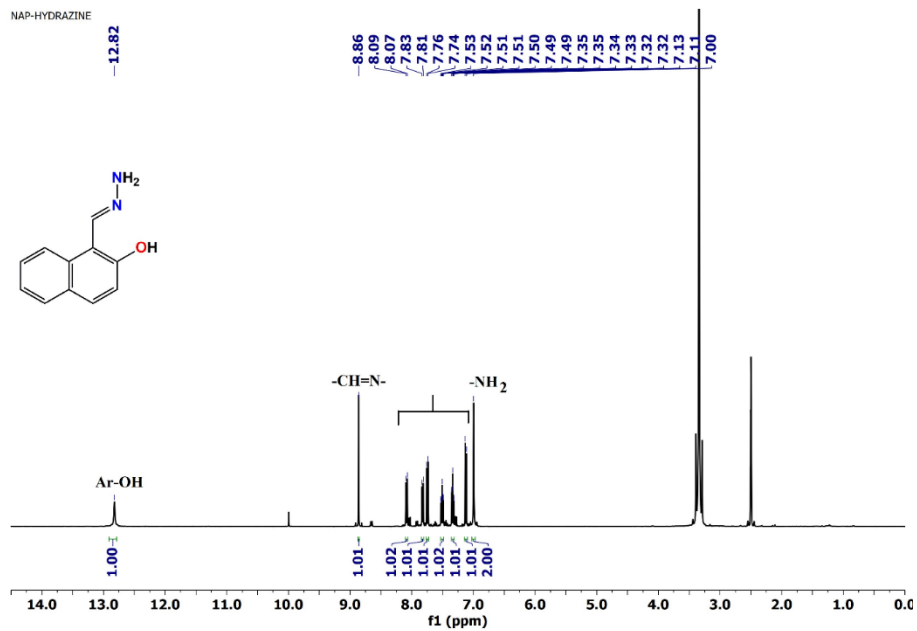

**Fig. S2.**  $^1\text{H}$  NMR spectrum (400 MHz,  $\text{DMSO-d}_6$ ) of the precursor, 2-hydroxy naphthalene hydrazone.

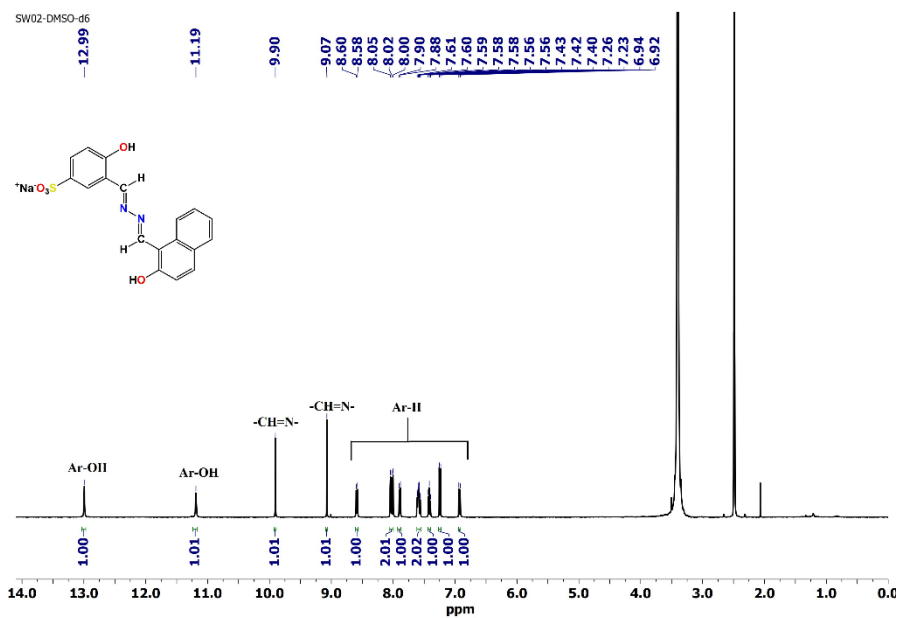

Fig. S3.  $^1\text{H}$  NMR spectrum (400 MHz,  $\text{DMSO-d}_6$ ) of SW2.

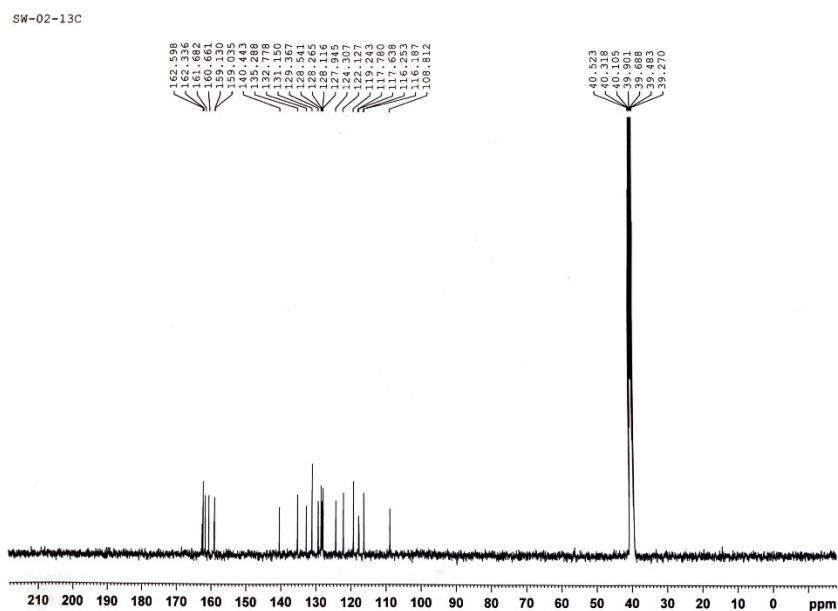

Fig. S4.  $^{13}\text{C}$  NMR spectrum (101 MHz,  $\text{DMSO-d}_6$ ) of SW2.

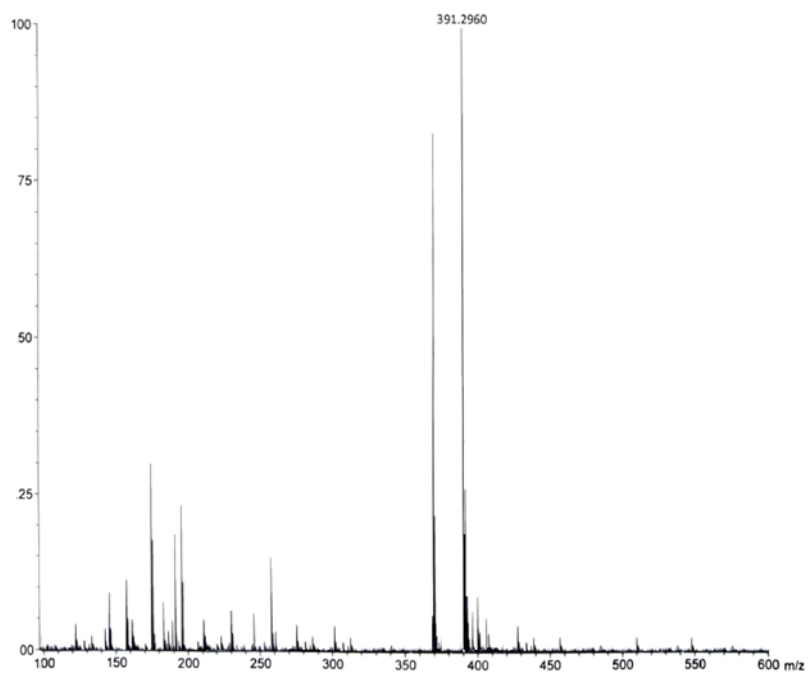

**Fig. S5.** ESI-MS of SW2 in water.

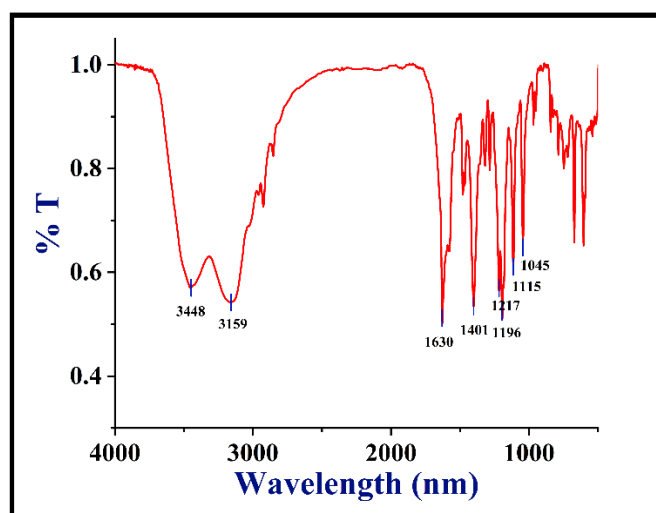

**Fig. S6.** FT-IR spectrum of the chemosensor, SW2.

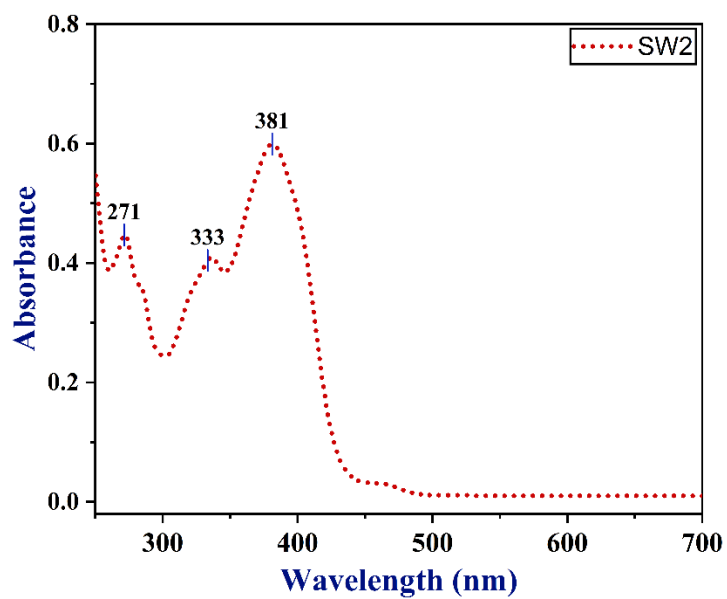

Fig. S7. UV-Vis spectrum of the chemosensor, SW2.

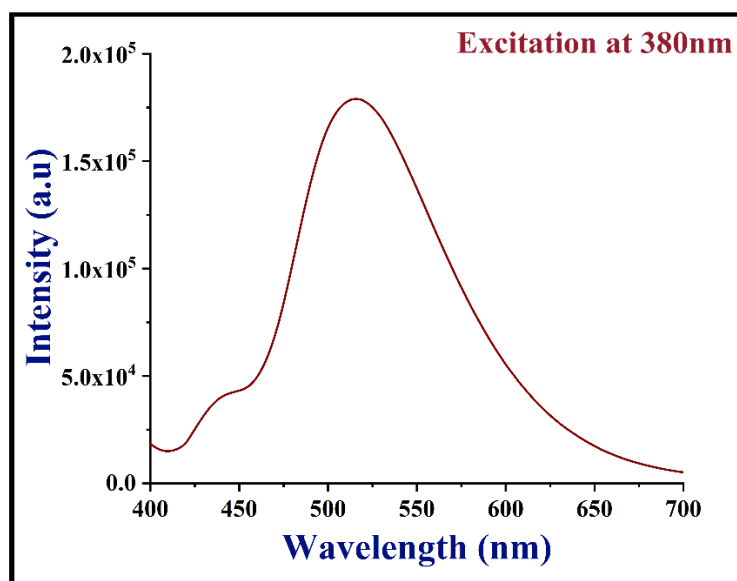

Fig. S8. Fluorescence spectra of SW2 in water.



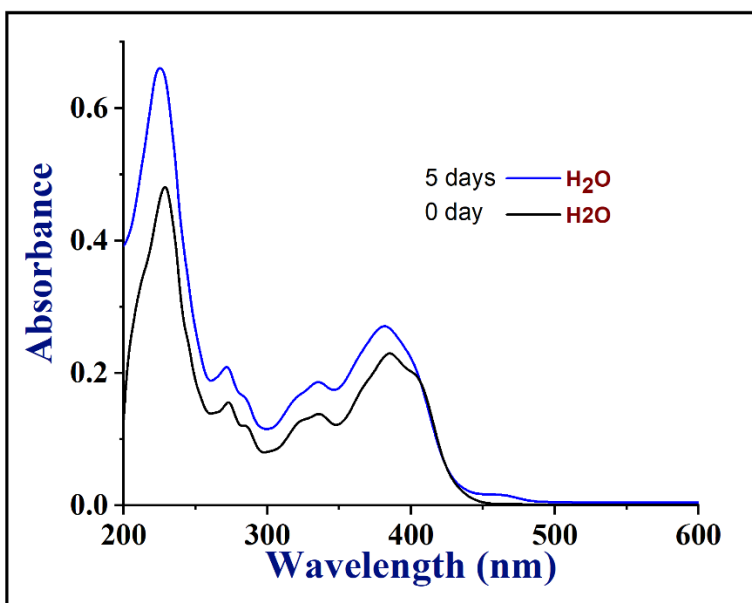

Fig. S9. Water-phase stability of SW2 for 5 days.

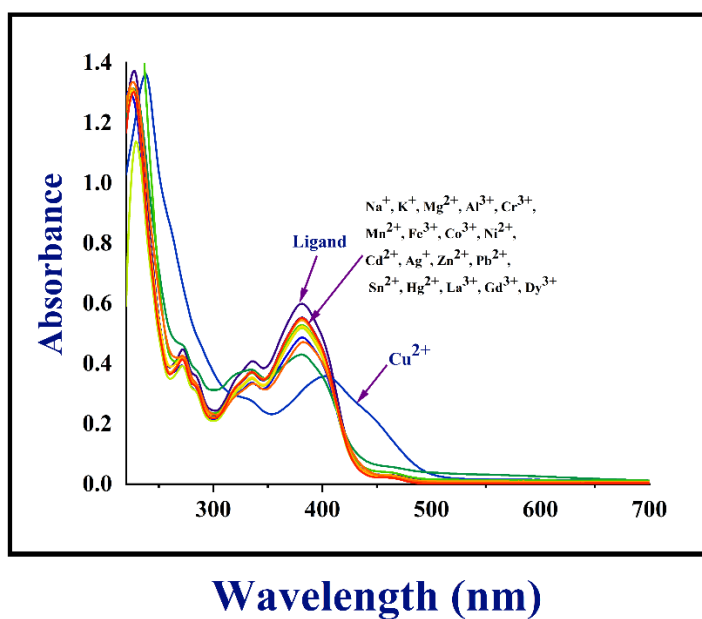

Fig. S10. Spectrophotometry study of SW2 with Cu (II) and other metal ions ( $M^{+2/+3+}$ ) in  $H_2O$  medium at 298 K.

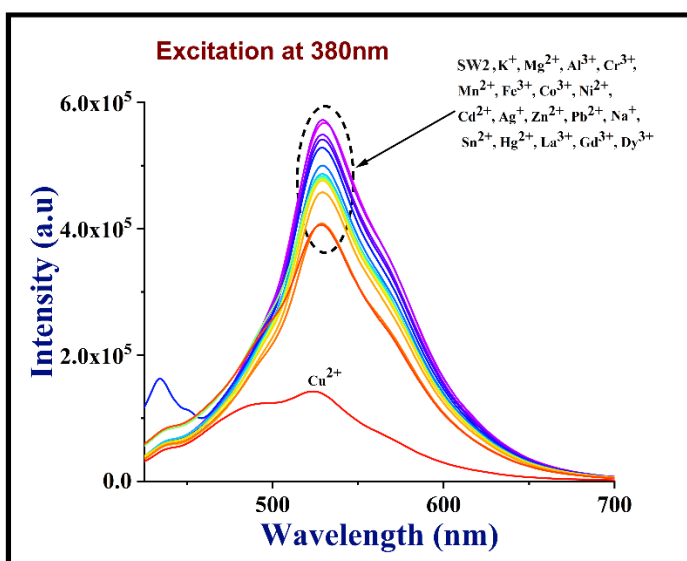

**Fig. S11.** Spectrofluorimetric study of SW2 with Cu (II) and other metal ions ( $M^{+2/+3+}$ ) in  $H_2O$  medium at 298 K.

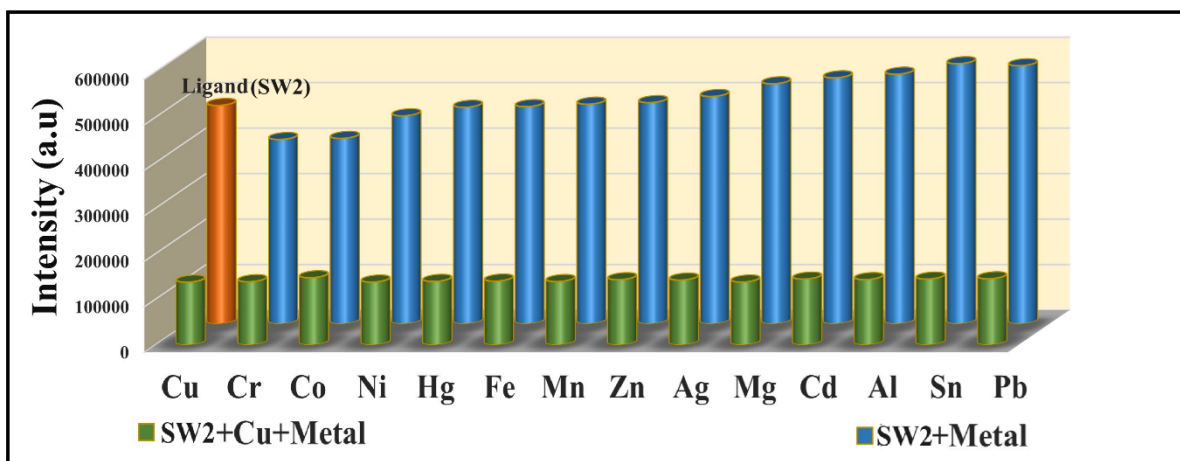

**Fig. S12.** Fluorescence response of SW2 towards  $Cu^{2+}$  ions coexistence of other metal ions in aqueous medium.

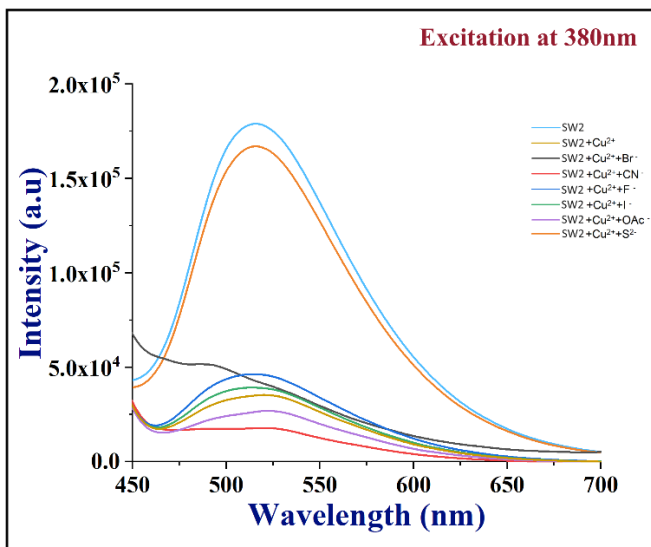

Fig. S13. Fluorescence spectra of SW2 towards Cu<sup>2+</sup> in presence of different anions.

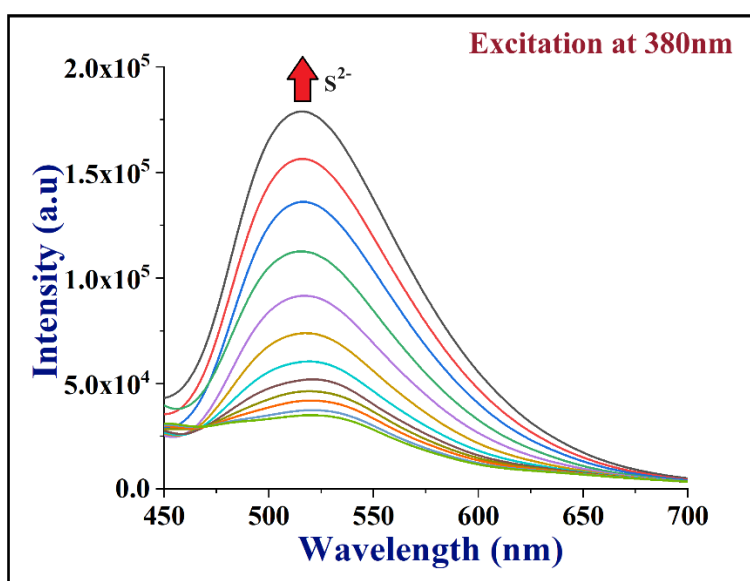

Fig. S14. Changes in the fluorescence spectrum upon a gradual addition of S<sup>2-</sup> to SW2-Cu<sup>2+</sup> complex in H<sub>2</sub>O.

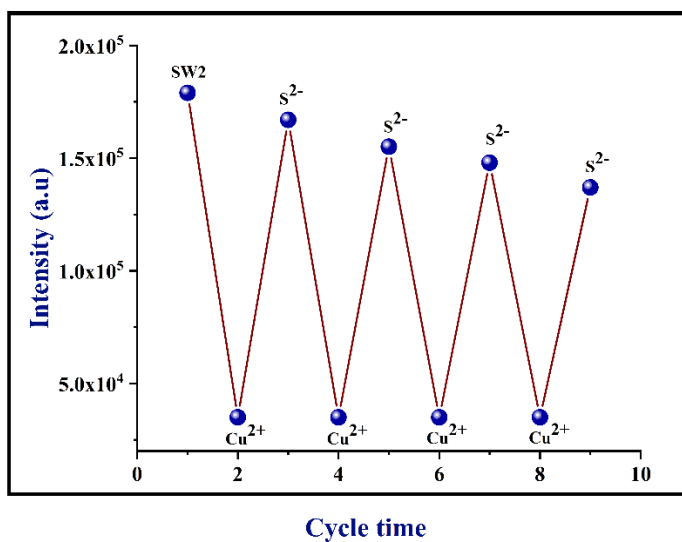

Fig. S15. Reversible switching cycles of fluorescence by alternating adding Cu<sup>2+</sup> and S<sup>2-</sup>.

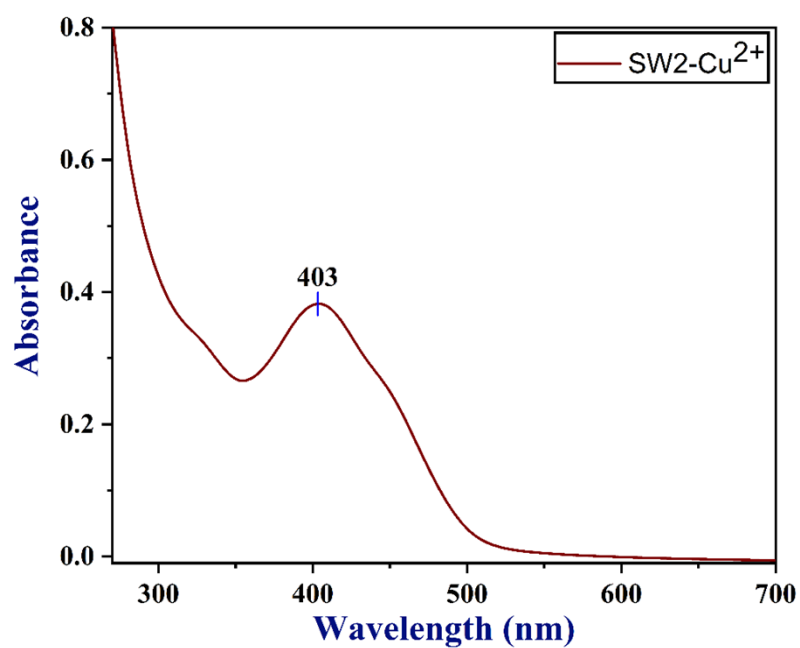

Fig. S16. UV-Vis spectrum of the SW2-Cu<sup>2+</sup> complex.

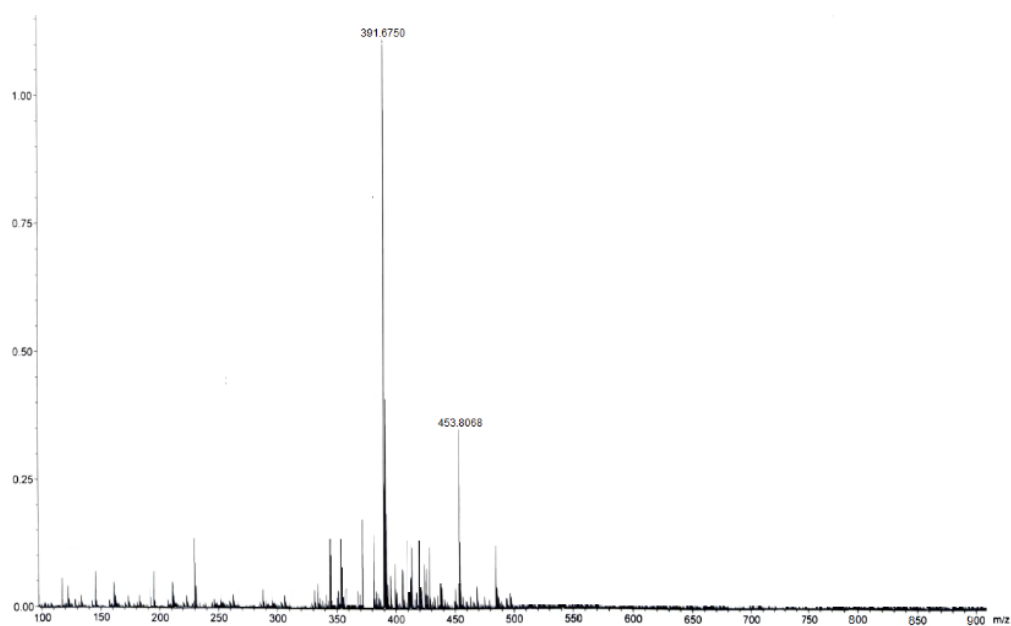

**Fig. S17.** ESI-MS of the SW2-Cu<sup>2+</sup> complex.

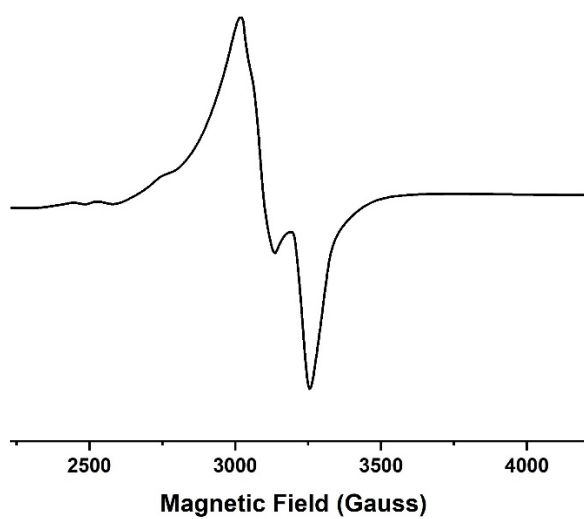

**Fig. S18.** EPR of the SW2-Cu<sup>2+</sup> complex.

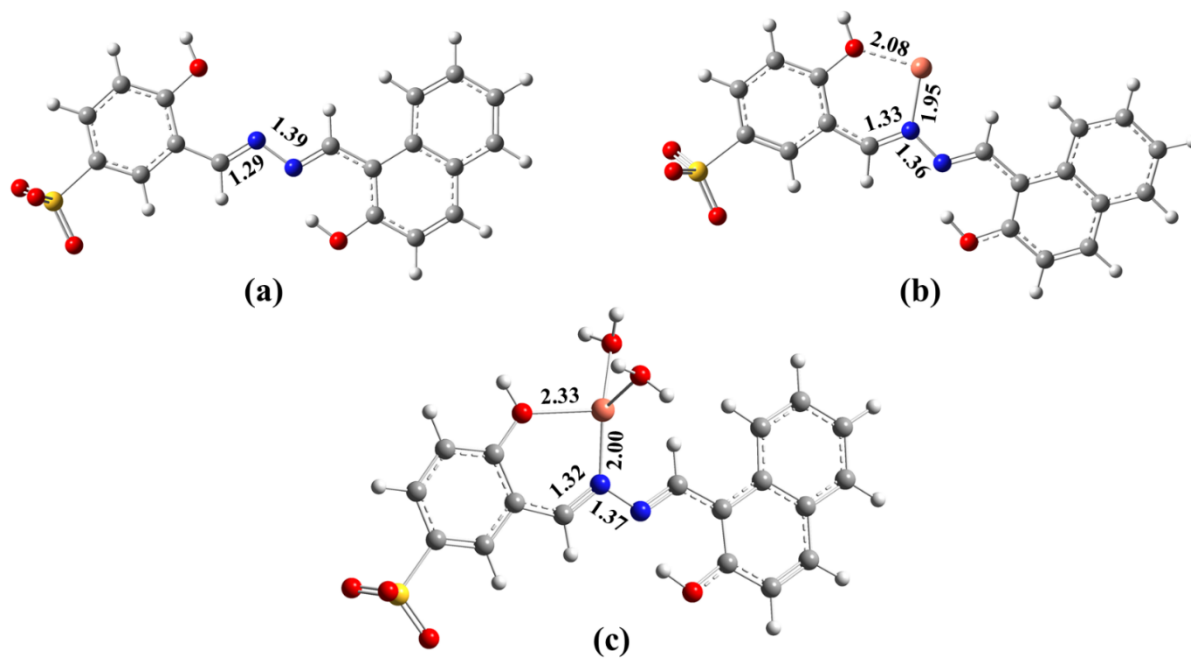

**Fig. S19.** Ground state optimized geometries of the (a) SW2 (b) SW2-Cu<sup>2+</sup> (c) SW2-Cu<sup>2+</sup> aqua complex.

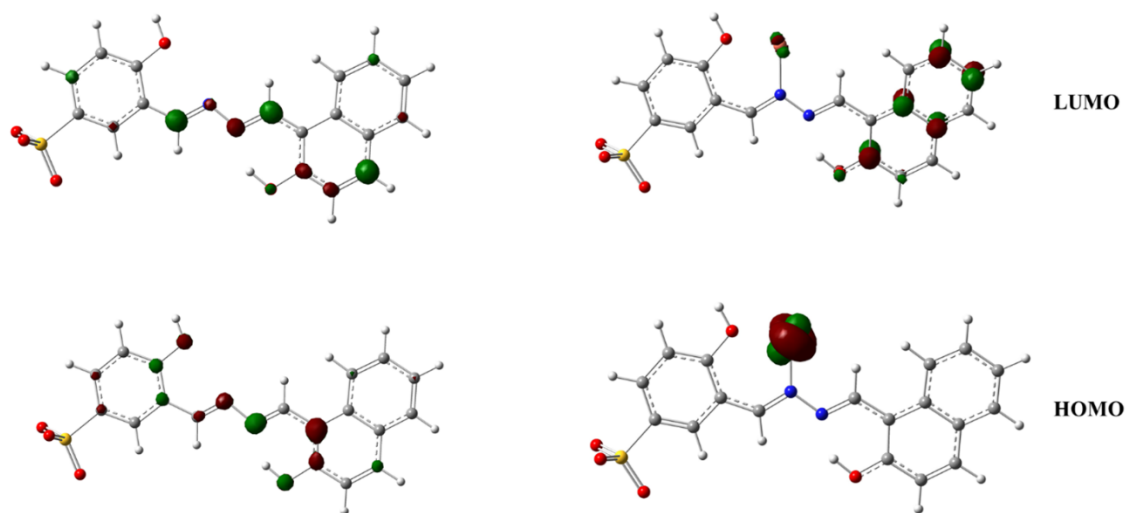

**Fig.S20.** The electron cloud distribution of LUMO and HOMO orbitals of SW2 and SW2-Cu<sup>2+</sup>.

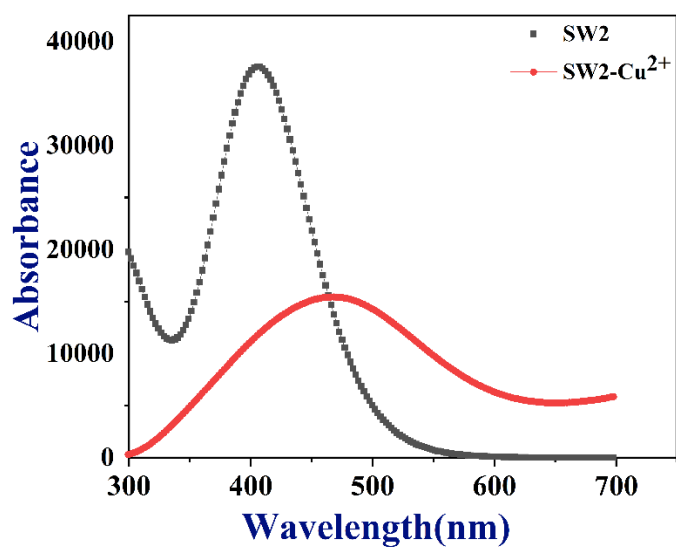

Fig. S21. Theoretical adsorption spectra of SW2 and SW2-Cu<sup>2+</sup>.

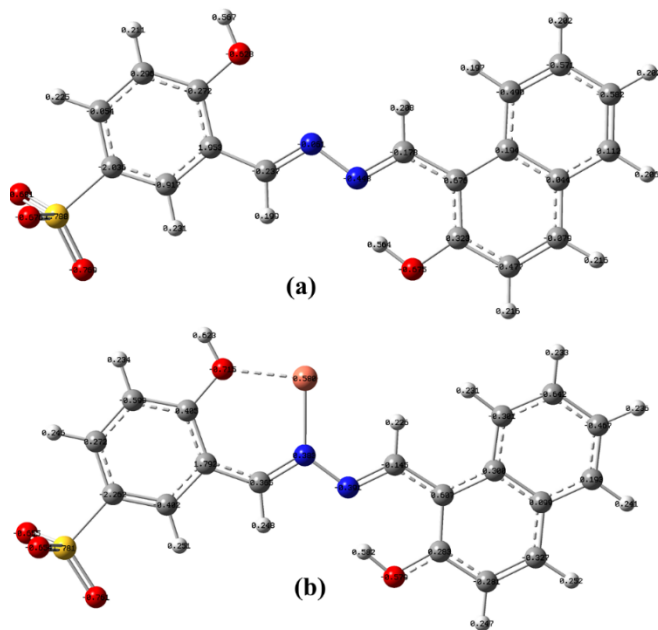

Fig. S22. Mulliken charge analysis of the (a) SW2 (b) SW2-Cu<sup>2+</sup>.

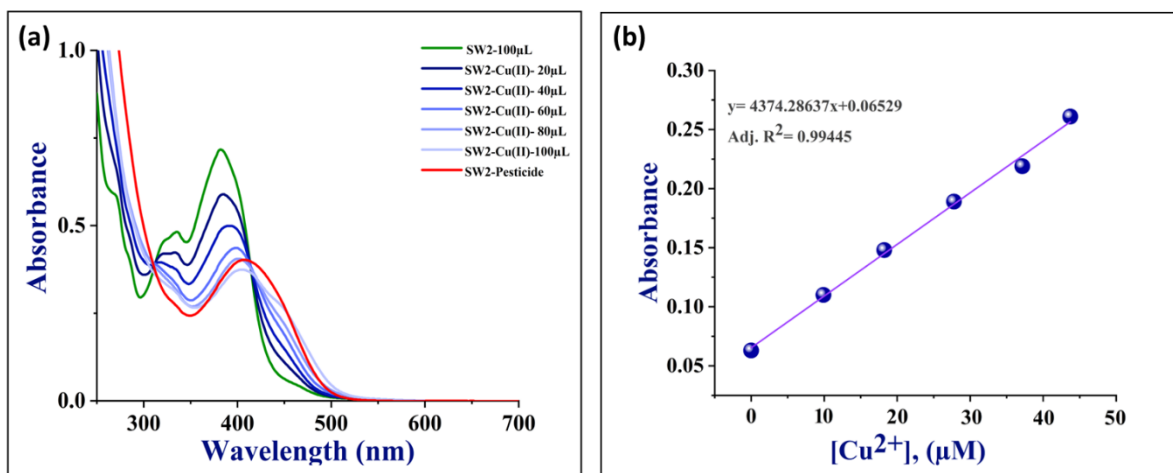

**Fig. S23.** (a) Spectrophotometric analysis for the determination of the concentration of  $Cu^{2+}$  ion in the pesticide-contaminated water by comparing a known concentration of  $CuCl_2$ ; (b) Determination of the concentration of  $Cu^{2+}$  ion in the pesticide-contaminated water.



**Table S1:** Computed absorption wavelengths ( $\lambda_{max}$  in nm), vertical excitation energies ( $E_{0-0}$  in eV), oscillator strengths (f), the composition of the corresponding electronic transitions (H, HOMO; L, LUMO) of **SW2** calculated by using B3LYP/6-31+G(d) level of theory.

| No. of States | $\lambda_{max}$ (nm) | $E_{0-0}$ (eV) | Oscillator Strength (f) | Major contributions |
|---------------|----------------------|----------------|-------------------------|---------------------|
| 1             | 406.96               | 3.05           | 0.919                   | HOMO->LUMO (99%)    |
| 2             | 350.09               | 3.54           | 0.0002                  | H-4->LUMO (98%)     |
| 3             | 337.77               | 3.67           | 0.0679                  | H-1->LUMO (92%)     |
| 4             | 329.17               | 3.77           | 0.0783                  | H-2->LUMO (90%)     |
| 5             | 309.09               | 4.01           | 0.0012                  | HOMO->L+1 (85%)     |
| 6             | 306.50               | 4.04           | 0.0001                  | H-3->LUMO (97%)     |
| 7             | 292.57               | 4.24           | 0.4236                  | H-5->LUMO (83%)     |
| 8             | 273.32               | 4.54           | 0.0496                  | HOMO->L+2 (31%)     |
| 9             | 269.68               | 4.60           | 0.0291                  | HOMO->L+2 (57%)     |
| 10            | 266.36               | 4.65           | 0.0309                  | HOMO->L+3 (38%)     |
| 11            | 262.53               | 4.72           | 0.0001                  | H-4->L+1 (88%)      |
| 12            | 255.80               | 4.85           | 0.1035                  | HOMO->L+3 (45%)     |
| 13            | 246.78               | 5.02           | 0.0023                  | H-7->LUMO (53%)     |
| 14            | 246.36               | 5.03           | 0.0124                  | H-6->LUMO (65%)     |
| 15            | 244.40               | 5.07           | 0.0001                  | H-3->L+1 (95%)      |
| 16            | 243.54               | 5.09           | 0.0001                  | H-8->LUMO (68%)     |
| 17            | 239.82               | 5.17           | 0.4494                  | H-2->L+1 (42%)      |
| 18            | 237.39               | 5.22           | 0.0133                  | H-5->L+1 (52%)      |
| 19            | 235.71               | 5.26           | 0.0677                  | H-9->LUMO (57%)     |
| 20            | 231.06               | 5.37           | 0.001                   | H-1->L+2 (42%)      |
| 21            | 230.77               | 5.37           | 0                       | HOMO->L+5 (78%)     |
| 22            | 227.50               | 5.45           | 0.0005                  | H-3->L+3 (86%)      |
| 23            | 226.94               | 5.46           | 0.026                   | H-2->L+2 (35%)      |
| 24            | 226.03               | 5.49           | 0.0002                  | H-4->L+2 (85%)      |
| 25            | 224.11               | 5.53           | 0.0004                  | HOMO->L+7 (79%)     |
| 26            | 222.93               | 5.56           | 0.2583                  | H-1->L+3 (41%)      |
| 27            | 222.60               | 5.57           | 0.0023                  | HOMO->L+6 (77%)     |
| 28            | 219.42               | 5.65           | 0.167                   | H-2->L+4 (36%)      |
| 29            | 217.54               | 5.70           | 0.0001                  | H-4->L+3 (97%)      |
| 30            | 216.84               | 5.72           | 0.361                   | H-1->L+4 (52%)      |

**Table S2:** Computed absorption wavelengths ( $\lambda_{max}$  in nm), vertical excitation energies ( $E_{0-0}$  in eV), oscillator strengths (f), the composition of the corresponding electronic transitions (H, HOMO; L, LUMO) of **SW2-Cu<sup>2+</sup>** Calculated by using B3LYP/6-31+G(d)/LAN2DZP level of theory.

| No. of States | $\lambda_{max}$ (nm) | $E_{0-0}$ (eV) | Oscillator Strength (f) | Major contributions    |
|---------------|----------------------|----------------|-------------------------|------------------------|
| 1             | 1350.149113          | 0.918268944    | 0.0005                  | H-2(B)->LUMO(B) (70%)  |
| 2             | 1218.517867          | 1.017465589    | 0.0059                  | H-3(B)->LUMO(B) (90%)  |
| 3             | 1080.94327           | 1.14696121     | 0.024                   | HOMO(B)->LUMO(B) (90%) |
| 4             | 1049.113158          | 1.181760033    | 0.1255                  | H-1(B)->LUMO(B) (59%)  |
| 5             | 831.717938           | 1.490649586    | 0.1349                  | H-4(B)->LUMO(B) (95%)  |
| 6             | 733.1137241          | 1.691142805    | 0.0001                  | H-5(B)->LUMO(B) (99%)  |
| 7             | 679.7379003          | 1.823938314    | 0.0001                  | H-6(B)->LUMO(B) (94%)  |
| 8             | 670.6198237          | 1.848737476    | 0                       | H-7(B)->LUMO(B) (99%)  |
| 9             | 629.2974978          | 1.97013337     | 0.0435                  | H-9(B)->LUMO(B) (89%)  |
| 10            | 560.3552066          | 2.212525172    | 0.0001                  | H-8(B)->LUMO(B) (99%)  |
| 11            | 544.6263695          | 2.276423011    | 0                       | H-10(B)->LUMO(B) (96%) |
| 12            | 535.2682857          | 2.316221665    | 0.0061                  | H-11(B)->LUMO(B) (71%) |
| 13            | 505.0272628          | 2.454916975    | 0.1906                  | HOMO(A)->LUMO(A) (61%) |
| 14            | 488.5691493          | 2.537614178    | 0.0029                  | H-15(B)->LUMO(B) (84%) |
| 15            | 475.2355131          | 2.60881177     | 0.0967                  | H-12(B)->LUMO(B) (63%) |
| 16            | 447.8712315          | 2.768206379    | 0.0001                  | H-2(A)->LUMO(A) (90%)  |
| 17            | 446.2110164          | 2.778506031    | 0.0016                  | H-16(B)->LUMO(B) (46%) |
| 18            | 428.6698925          | 2.892202186    | 0.1447                  | H-3(A)->LUMO(A) (30%)  |
| 19            | 420.8703385          | 2.945800373    | 0.0031                  | H-2(B)->L+1(B) (70%)   |
| 20            | 406.7989796          | 3.047696927    | 0.0039                  | H-1(A)->LUMO(A) (88%)  |
| 21            | 402.9254591          | 3.076995936    | 0.0252                  | H-4(B)->L+1(B) (18%)   |
| 22            | 391.8837885          | 3.163693004    | 0.0642                  | H-16(B)->LUMO(B) (26%) |
| 23            | 385.8469269          | 3.21319133     | 0.0001                  | HOMO(B)->L+1(B) (96%)  |
| 24            | 384.7811837          | 3.222091029    | 0.0008                  | H-2(A)->L+2(A) (46%)   |
| 25            | 381.9128666          | 3.24629021     | 0.0016                  | H-13(B)->LUMO(B) (55%) |
| 26            | 381.6777275          | 3.248290143    | 0.0016                  | H-14(B)->LUMO(B) (48%) |
| 27            | 374.9937786          | 3.306188184    | 0.0087                  | H-3(A)->LUMO(A) (30%)  |
| 28            | 356.5120425          | 3.477582388    | 0.0458                  | H-17(B)->LUMO(B) (40%) |
| 29            | 348.9759992          | 3.552679848    | 0                       | H-6(A)->LUMO(A) (95%)  |
| 30            | 343.446518           | 3.609877914    | 0.0238                  | HOMO(A)->L+1(A) (29%)  |
